# Supplementary material
Source: PubMed Central journal article supplement (PMC5884963)
Supplement: jmm-67-97-s001.pdf [file jmm-67-97-s001.pdf]

**Supplemental Table. SNP comparison of rat *Streptococcus agalactiae* strains**

| GBS Strains |              | Case 1       |              |              | Case 2       |              |              |              |
|-------------|--------------|--------------|--------------|--------------|--------------|--------------|--------------|--------------|
|             |              | 195-16-B-RAT | 196-16-B-RAT | 197-16-B-RAT | 198-16-B-RAT | 199-16-B-RAT | 200-16-B-RAT | 195-16-B-RAT |
|             | 195-16-B-RAT |              | 3793         | 3793         | 3793         | 3737         | 3793         | 3793         |
| Case 1      | 196-16-B-RAT |              |              | 0            | 14           | 82           | 14           | 14           |
|             | 197-16-B-RAT |              |              |              | 14           | 82           | 14           | 14           |
|             | 198-16-B-RAT |              |              |              |              | 81           | 23           | 23           |
| Case 2      | 199-16-B-RAT |              |              |              |              |              | 88           | 88           |
|             | 200-16-B-RAT |              |              |              |              |              |              | 0            |
|             | 201-16-B-RAT |              |              |              |              |              |              |              |

There were 9228 total SNPs in the tree used for figure with estimated core genome size ~1,500,000 bp

Note: Case 1 isolates from cardiac tissue (196-16-B-RAT) and blood (197-16-B-RAT); Case 2 isolates from cardiac tissue (200-16-B-RAT) and fetus (201-16-B-RAT)
